# Supplementary material for: Isolation of Specific Clones from Nonarrayed BAC Libraries through Homologous Recombination
Source: Hindawi journal article supplement (doi:10.1155/2011/560124), 2010-10-13
Supplement: f1 [file 560124.f1.pdf]

**Table 3. Recombination and screening oligos**

| GENE                | RECOMBINATION AND SCREENING PRIMERS                                                                                                                                                              |
|---------------------|--------------------------------------------------------------------------------------------------------------------------------------------------------------------------------------------------|
| <i>FLJ20539</i>     | ACATCAGAGCCCTTATCCCACTGGCCAAGGTAAGGAGACCTCCATCTCTGcatttagaccaccacagc<br>CAGGGACATGCTGGGGCACTCCAGTCAGTGGTGTGTATTACCAGCTCCgaaagccacgttgtgtctc<br>CCTATGGGTGGACTTTGTGG<br>AGCCGACATGCTCTGTAC        |
| <i>GRIA3</i>        | CCCTGCTTTATCGCTTTCTATAGTTTTAAAGTAGTTTGAAGCTTGAATAAcatttagaccaccacagc<br>CCACATCCCCCTTATCGTACCACCATTTGTTTTTCAGCTTGTCTAAGATgaaagccacgttgtgtctc<br>AGGGAGTGTGTGTTGGGAAG<br>GGCAGGCCCTGGTAAATATAG    |
| <i>NFAT5</i>        | GCGCCTACATTTATCTACCTCAGTCACCGACAGCAAGGCTATGCAAGTGcatttagaccaccacagc<br>GGCACTGTCGGCATCAAATATATCCATATTAGATTCTTACAATCTCGTgaaagccacgttgtgtctc<br>CATTTCCCGCTTTTGAGTTG<br>GTGCTTGCAGCTCCTTACC        |
| <i>DKFZP564D166</i> | CCATGGGATGCTGGCTAATGGGTCTCGCGGAGACCTCTTGAGCGAGTCAcatttagaccaccacagc<br>AACTACCTCAAATGTGAAACCAAGCCTGAAAATGTGCAGTGAAAACATAgaaagccacgttgtgtctc<br>GGTTAAAGCACACAGCACGA<br>AGCCTGAGTCCTTCAGTCCA      |
| <i>EMSI</i>         | GGTGTCTCCATTTTATCTTACCCTCCAGCCAGCAGCTAGTAATGTGACcatttagaccaccacagc<br>TTAAACACATGCGATTCACTCAATCTACCCTCCCTTCCGGATCTTTGGTgaaagccacgttgtgtctc<br>AGCTGCAATTTCTCCTGGTG<br>GGCAAATACGGTATCGACAA       |
| <i>GMPPA</i>        | CAGTTCCTAGAAGCTGCCCAGCAGGAGTTAACCTTCCAGTCAGGCGTTTcatttagaccaccacagc<br>CAAAATCCTGCAGGTACCTGTCCCCAGGAACCCGAgAGCCAGCTCAAGTGgaaagccacgttgtgtctc<br>CTACACCCTCCAGCCCTCCT<br>CTCTTCCCTTGTCTCAGGT      |
| <i>SKB1</i>         | CTCTTTGCACCCCAGCCCTGATTACCTTCAGCCATCCCAACAGAGGTAGcatttagaccaccacagc<br>ATGAGCAAGACCAAGGAAAGGAAGAGTAGATAAGGCAGACTAGGGACAGCgaaagccacgttgtgtctc<br>TGTGTTACCTCCACAGGAA<br>GCCCAGTTTGAGATGCCTTA      |
| <i>IDAX</i>         | GAGCCGTCGTTGCAAATGGCAAATACTAATTTCTCTCCACCTTATCCCCcatttagaccaccacagc<br>TGCGGGGAGTGAAGGGCTGTCAATGACGATGACCCCTGGAGGTAATGAGAgaaagccacgttgtgtctc<br>CAGATCTGGTGTCCCGTTTT<br>AGCATGCACCACCGAAAC       |
| <i>MGC13034</i>     | TCTgGACTGGTGGGGATCACaTTCCTGTCATGGGCTGGATCAAATACCcatttagaccaccacagc<br>TGGCAGGAgAGCATTTTGAAcTTGCACACAGCaATCAGGATGAATGTCACgaaagccacgttgtgtctc<br>TTGGTTGATGCCAGTGAAAA<br>ACATCCAGGTGTCCGATGAT      |
| <i>HBB</i>          | CAGAGAAGACTCTTGGGTTTCTGATAGGCACTGACTCTCTCTGCCTATTcatttagaccaccacagc<br>CAAAGAACCTCTGGGTCCAAGGGTAGACCACCAGCAGCCTAAGGGTGGGAgaaagccacgttgtgtctc<br>acaagacaggttaaggagacca<br>gtctgttccattctaaactgta |
